# Supplementary material for: Effects of Water–Ethanol Extracts from Four Sphagnum Species on Gene Expression of Selected Enzymes in Normal Human Dermal Fibroblasts and Their Antioxidant Properties
Source: MDPI journal article supplement (doi:10.3390/ph16081076), 2023-07-28

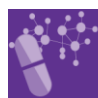

## Supplementary materials

**Table S1.** The results of Linear Mixed Effects Models including impact of moss species identity, total phenols content (TP), total phenolic acids content (TPA) and total flavonoids content (TF) on antioxidant properties. The significant p-values were bolded.

| Variable                                | Estimate | SE       | Adj SE   | z     | P-value           | Variable | Chisq   | Df | P-value           |
|-----------------------------------------|----------|----------|----------|-------|-------------------|----------|---------|----|-------------------|
| <b>ABTS full average coefficients</b>   |          |          |          |       |                   |          |         |    |                   |
| Intercept                               | 257.6591 | 44.93292 | 48.23132 | 5.342 | <b>&lt;0.0001</b> | TP       | 0.1701  | 1  | 0.68              |
| SM                                      | 25.48165 | 9.87407  | 10.49916 | 2.427 | <b>0.015223</b>   | TPA      | 1.7386  | 1  | 0.1873            |
| SP                                      | 53.98851 | 8.23326  | 8.84245  | 6.106 | <b>&lt;0.0001</b> | TF       | 21.2814 | 1  | <b>&lt;0.0001</b> |
| SS                                      | -46.0785 | 11.51261 | 12.3309  | 3.737 | <b>0.000186</b>   | moss     | 86.0089 | 3  | <b>&lt;0.0001</b> |
| TF                                      | -19.7933 | 4.18129  | 4.47695  | 4.421 | <b>&lt;0.0001</b> |          |         |    |                   |
| TPA                                     | 0.22942  | 0.65228  | 0.67553  | 0.34  | 0.73415           |          |         |    |                   |
| TP                                      | 0.03451  | 0.44238  | 0.47488  | 0.073 | 0.942065          |          |         |    |                   |
| <b>conditional average coefficients</b> |          |          |          |       |                   |          |         |    |                   |
| Intercept                               | 257.6591 | 44.9329  | 48.2313  | 5.342 | <b>&lt;0.0001</b> |          |         |    |                   |
| SM                                      | 25.4944  | 9.8601   | 10.4863  | 2.431 | <b>0.015048</b>   |          |         |    |                   |
| SP                                      | 54.0155  | 8.1462   | 8.7618   | 6.165 | <b>&lt;0.0001</b> |          |         |    |                   |
| SS                                      | -46.1016 | 11.4693  | 12.2908  | 3.751 | <b>0.000176</b>   |          |         |    |                   |
| TF                                      | -19.8331 | 4.0901   | 4.3924   | 4.515 | <b>&lt;0.0001</b> |          |         |    |                   |
| TPA                                     | 1.2896   | 1.0121   | 1.0945   | 1.178 | 0.238703          |          |         |    |                   |
| TP                                      | 0.3782   | 1.4194   | 1.5302   | 0.247 | 0.804771          |          |         |    |                   |
| <b>DPPH full average coefficients</b>   |          |          |          |       |                   |          |         |    |                   |
| Intercept                               | 53.24122 | 30.81867 | 31.60734 | 1.684 | 0.0921            | TP       | 0.001   | 1  | 0.9748            |
| SM                                      | 34.81441 | 6.60436  | 6.8218   | 5.103 | <b>&lt;0.0001</b> | TPA      | 0.3204  | 1  | 0.57135           |
| SP                                      | 12.16988 | 5.64893  | 5.84136  | 2.083 | <b>0.0372</b>     | TF       | 3.2557  | 1  | 0.07118           |
| SS                                      | -11.6317 | 7.77383  | 7.97946  | 1.458 | 0.1449            | moss     | 178.712 | 3  | <b>&lt;0.0001</b> |
| TF                                      | -2.23689 | 2.81602  | 2.88403  | 0.776 | 0.438             |          |         |    |                   |
| TP                                      | -0.09069 | 0.37627  | 0.39264  | 0.231 | 0.8173            |          |         |    |                   |
| TPA                                     | 0.00216  | 0.21485  | 0.22872  | 0.009 | 0.9925            |          |         |    |                   |
| <b>conditional average coefficients</b> |          |          |          |       |                   |          |         |    |                   |
| Intercept                               | 53.24122 | 30.81867 | 31.60734 | 1.684 | 0.0921            |          |         |    |                   |
| SM                                      | 34.83942 | 6.54044  | 6.76009  | 5.154 | <b>&lt;0.0001</b> |          |         |    |                   |
| SP                                      | 12.17863 | 5.64152  | 5.83434  | 2.087 | <b>0.0369</b>     |          |         |    |                   |
| SS                                      | -11.6401 | 7.77036  | 7.97623  | 1.459 | 0.1445            |          |         |    |                   |
| TF                                      | -4.70045 | 2.25469  | 2.42864  | 1.935 | 0.0529            |          |         |    |                   |
| TP                                      | -0.60861 | 0.79681  | 0.84817  | 0.718 | 0.473             |          |         |    |                   |
| TPA                                     | 0.01934  | 0.64262  | 0.68413  | 0.028 | 0.9775            |          |         |    |                   |
| <b>FRAP full average coefficients</b>   |          |          |          |       |                   |          |         |    |                   |
| Intercept                               | 44.83117 | 24.89747 | 25.60028 | 1.751 | 0.079912          | TP       | 8.5871  | 1  | <b>0.00339</b>    |
| SM                                      | 49.63696 | 13.08715 | 13.29593 | 3.733 | <b>0.000189</b>   | TPA      | 0.9252  | 1  | 0.33612           |
| SP                                      | 15.98666 | 4.22915  | 4.44404  | 3.597 | <b>0.000322</b>   | TF       | 8.1576  | 1  | <b>0.00429</b>    |
| SS                                      | -5.47168 | 9.56442  | 9.73321  | 0.562 | 0.574003          | moss     | 323.998 | 3  | <b>&lt;0.0001</b> |
| TF                                      | 2.11798  | 3.02768  | 3.08309  | 0.687 | 0.492104          |          |         |    |                   |
| TP                                      | -0.69851 | 0.92941  | 0.94622  | 0.738 | 0.460384          |          |         |    |                   |
| TPA                                     | -0.01696 | 0.19017  | 0.20217  | 0.084 | 0.933162          |          |         |    |                   |
| <b>conditional average coefficients</b> |          |          |          |       |                   |          |         |    |                   |
| Intercept                               | 44.8312  | 24.8975  | 25.6003  | 1.751 | 0.079912          |          |         |    |                   |
| SM                                      | 49.6487  | 13.0663  | 13.2755  | 3.74  | <b>0.000184</b>   |          |         |    |                   |
| SP                                      | 15.9905  | 4.2225   | 4.4377   | 3.603 | <b>0.000314</b>   |          |         |    |                   |



|                                         |          |         |         |       |          |      |        |   |        |
|-----------------------------------------|----------|---------|---------|-------|----------|------|--------|---|--------|
| SS                                      | -5.473   | 9.5652  | 9.734   | 0.562 | 0.573943 |      |        |   |        |
| TF                                      | 5.0284   | 2.6699  | 2.8165  | 1.785 | 0.074199 |      |        |   |        |
| TP                                      | -1.5318  | 0.786   | 0.8288  | 1.848 | 0.06457  |      |        |   |        |
| TPA                                     | -0.1576  | 0.5604  | 0.5982  | 0.264 | 0.792152 |      |        |   |        |
| <b>PL full average coefficients</b>     |          |         |         |       |          |      |        |   |        |
| Intercept                               | 7.0948   | 5.26581 | 5.44906 | 1.302 | 0.193    | TP   | 0.1132 | 1 | 0.7365 |
| TF                                      | 0.56014  | 0.54409 | 0.55589 | 1.008 | 0.314    | TPA  | 0.9634 | 1 | 0.3263 |
| TPA                                     | -0.26905 | 0.28412 | 0.29043 | 0.926 | 0.354    | TF   | 0.002  | 1 | 0.9644 |
| SM                                      | -0.51516 | 1.48975 | 1.53211 | 0.336 | 0.737    | moss | 2.45   | 3 | 0.4844 |
| SP                                      | 0.36824  | 1.12058 | 1.15807 | 0.318 | 0.75     |      |        |   |        |
| SS                                      | -0.24169 | 0.95694 | 1.00128 | 0.241 | 0.809    |      |        |   |        |
| TP                                      | -0.03565 | 0.13094 | 0.13623 | 0.262 | 0.794    |      |        |   |        |
| <b>conditional average coefficients</b> |          |         |         |       |          |      |        |   |        |
| Intercept                               | 7.0948   | 5.2658  | 5.4491  | 1.302 | 0.1929   |      |        |   |        |
| TF                                      | 0.815    | 0.4723  | 0.4919  | 1.657 | 0.0975   |      |        |   |        |
| TPA                                     | -0.4696  | 0.2161  | 0.2303  | 2.039 | 0.0414   |      |        |   |        |
| SM                                      | -2.8374  | 2.3737  | 2.5179  | 1.127 | 0.2598   |      |        |   |        |
| SP                                      | 2.0283   | 1.884   | 2.0049  | 1.012 | 0.3117   |      |        |   |        |
| SS                                      | -1.3312  | 1.8956  | 2.0178  | 0.66  | 0.5094   |      |        |   |        |
| TP                                      | -0.1473  | 0.2332  | 0.2455  | 0.6   | 0.5483   |      |        |   |        |

**Table S2.** The results of Linear Mixed Effects Models including impact of moss species identity, total phenols content (TP), total phenolic acids content (TPA) and total flavonoids content (TF) on enzymes genes expression. The significant p-values were bolded.

| Variable                           | Estimate   | SE        | Adj SE    | z     | P-value         |      | Chisq   | Df | Pr(>Chisq)        |
|------------------------------------|------------|-----------|-----------|-------|-----------------|------|---------|----|-------------------|
| ELANE (full average coefficients)  |            |           |           |       |                 |      |         |    |                   |
| (Intercept)                        | 3.160e-05  | 2.098e-05 | 2.165e-05 | 1.460 | 0.144           | TP   | 0.004   | 1  | 0.94979           |
| mossSM                             | 4.665e-06  | 8.490e-06 | 8.640e-06 | 0.540 | 0.589           | TPA  | 18.1259 | 1  | <b>0.00002068</b> |
| mossSP                             | -2.365e-07 | 3.826e-06 | 4.000e-06 | 0.059 | 0.953           | TF   | 2.1654  | 1  | 0.14115           |
| mossSS                             | -4.393e-07 | 5.209e-06 | 5.372e-06 | 0.082 | 0.935           | moss | 15.6464 | 3  | 0.00134           |
| TPA                                | -1.837e-06 | 1.408e-06 | 1.431e-06 | 1.284 | 0.199           |      |         |    |                   |
| TP                                 | 2.278e-07  | 5.573e-07 | 5.721e-07 | 0.398 | 0.690           |      |         |    |                   |
| TF                                 | 5.389e-07  | 2.072e-06 | 2.122e-06 | 0.254 | 0.800           |      |         |    |                   |
| (conditional average coefficients) |            |           |           |       |                 |      |         |    |                   |
| (Intercept)                        | 3.160e-05  | 2.098e-05 | 2.165e-05 | 1.460 | 0.1444          |      |         |    |                   |
| mossSM                             | 1.351e-05  | 9.447e-06 | 9.834e-06 | 1.374 | 0.1694          |      |         |    |                   |
| mossSP                             | -6.852e-07 | 6.489e-06 | 6.785e-06 | 0.101 | 0.9196          |      |         |    |                   |
| mossSS                             | -1.273e-06 | 8.806e-06 | 9.085e-06 | 0.140 | 0.8886          |      |         |    |                   |
| TPA                                | -2.351e-06 | 1.153e-06 | 1.188e-06 | 1.979 | <b>0.0479</b>   |      |         |    |                   |
| TP                                 | 7.498e-07  | 7.941e-07 | 8.282e-07 | 0.905 | 0.3653          |      |         |    |                   |
| TF                                 | 2.574e-06  | 3.908e-06 | 4.034e-06 | 0.638 | 0.5235          |      |         |    |                   |
| HYAL1 (full average coefficients)  |            |           |           |       |                 |      |         |    |                   |
| (Intercept)                        | 2.779e-05  | 5.433e-06 | 5.675e-06 | 4.897 | <b>0.000001</b> | TP   | 0.8812  | 1  | 0.348             |
| TPA                                | -8.572e-07 | 6.882e-07 | 7.040e-07 | 1.218 | 0.223           | TPA  | 7.6769  | 1  | <b>0.006</b>      |
| TP                                 | 1.283e-07  | 3.447e-07 | 3.536e-07 | 0.363 | 0.717           | TF   | 0.6552  | 1  | 0.418             |



|                                    |            |           |           |       |                 |      |         |   |                 |
|------------------------------------|------------|-----------|-----------|-------|-----------------|------|---------|---|-----------------|
| TF                                 | -7.577e-08 | 3.173e-07 | 3.325e-07 | 0.228 | 0.820           | moss | 2.6793  | 3 | 0.444           |
| mossSM                             | 1.182e-07  | 1.257e-06 | 1.288e-06 | 0.092 | 0.927           |      |         |   |                 |
| mossSP                             | 6.688e-08  | 7.744e-07 | 8.015e-07 | 0.083 | 0.934           |      |         |   |                 |
| mossSS                             | 3.045e-08  | 5.757e-07 | 6.082e-07 | 0.050 | 0.960           |      |         |   |                 |
| (conditional average coefficients) |            |           |           |       |                 |      |         |   |                 |
| (Intercept)                        | 2.779e-05  | 5.433e-06 | 5.675e-06 | 4.897 | <b>0.000001</b> |      |         |   |                 |
| TPA                                | -1.092e-06 | 5.892e-07 | 6.126e-07 | 1.782 | 0.0747          |      |         |   |                 |
| TP                                 | 3.702e-07  | 5.032e-07 | 5.208e-07 | 0.711 | 0.4771          |      |         |   |                 |
| TF                                 | -3.668e-07 | 6.170e-07 | 6.546e-07 | 0.560 | 0.5752          |      |         |   |                 |
| mossSM                             | 6.334e-06  | 6.732e-06 | 7.032e-06 | 0.901 | 0.3677          |      |         |   |                 |
| mossSP                             | 3.583e-06  | 4.420e-06 | 4.671e-06 | 0.767 | 0.4430          |      |         |   |                 |
| mossSS                             | 1.631e-06  | 3.892e-06 | 4.148e-06 | 0.393 | 0.6941          |      |         |   |                 |
| HYAL2 (full average coefficients)  |            |           |           |       |                 |      |         |   |                 |
| (Intercept)                        | 2.220e-03  | 6.573e-04 | 6.751e-04 | 3.288 | <b>0.00101</b>  | TP   | 0.0429  | 1 | 0.835828        |
| mossSM                             | 1.910e-04  | 3.466e-04 | 3.508e-04 | 0.545 | 0.58601         | TPA  | 9.0561  | 1 | <b>0.002618</b> |
| mossSP                             | 7.880e-05  | 1.659e-04 | 1.706e-04 | 0.462 | 0.64418         | TF   | 0.0093  | 1 | 0.92297         |
| mossSS                             | -3.526e-05 | 1.141e-04 | 1.201e-04 | 0.294 | 0.76906         | moss | 10.1493 | 3 | <b>0.017338</b> |
| TPA                                | -4.254e-05 | 5.650e-05 | 5.724e-05 | 0.743 | 0.45734         |      |         |   |                 |
| TP                                 | 1.180e-05  | 2.382e-05 | 2.432e-05 | 0.485 | 0.62747         |      |         |   |                 |
| TF                                 | -3.571e-06 | 3.342e-05 | 3.545e-05 | 0.101 | 0.91976         |      |         |   |                 |
| (conditional average coefficients) |            |           |           |       |                 |      |         |   |                 |
| (Intercept)                        | 2.220e-03  | 6.573e-04 | 6.751e-04 | 3.288 | <b>0.00101</b>  |      |         |   |                 |
| mossSM                             | 6.856e-04  | 3.036e-04 | 3.202e-04 | 2.141 | <b>0.03224</b>  |      |         |   |                 |
| mossSP                             | 2.828e-04  | 2.028e-04 | 2.163e-04 | 1.308 | 0.19104         |      |         |   |                 |
| mossSS                             | -1.265e-04 | 1.877e-04 | 2.005e-04 | 0.631 | 0.52802         |      |         |   |                 |
| TPA                                | -8.456e-05 | 5.284e-05 | 5.440e-05 | 1.554 | 0.12007         |      |         |   |                 |
| TP                                 | 3.358e-05  | 2.972e-05 | 3.085e-05 | 1.088 | 0.27647         |      |         |   |                 |
| TF                                 | -2.058e-05 | 7.803e-05 | 8.302e-05 | 0.248 | 0.80419         |      |         |   |                 |
| HYAL3 (full average coefficients)  |            |           |           |       |                 |      |         |   |                 |
| (Intercept)                        | 3.418e-06  | 1.976e-06 | 2.054e-06 | 1.664 | 0.0961          | TP   | 1.7068  | 1 | 0.191           |
| TF                                 | 2.896e-08  | 1.345e-07 | 1.405e-07 | 0.206 | 0.8367          | TPA  | 3.9951  | 1 | <b>0.046</b>    |
| TP                                 | 1.584e-08  | 7.372e-08 | 7.622e-08 | 0.208 | 0.8354          | TF   | 0.2783  | 1 | 0.598           |
| TPA                                | -1.336e-08 | 1.050e-07 | 1.086e-07 | 0.123 | 0.9021          | moss | 6.3106  | 3 | 0.097           |
| mossSM                             | 7.298e-08  | 6.388e-07 | 6.525e-07 | 0.112 | 0.9109          |      |         |   |                 |
| mossSP                             | 6.821e-08  | 5.025e-07 | 5.123e-07 | 0.133 | 0.8941          |      |         |   |                 |
| mossSS                             | -1.537e-08 | 2.959e-07 | 3.103e-07 | 0.050 | 0.9605          |      |         |   |                 |
| (conditional average coefficients) |            |           |           |       |                 |      |         |   |                 |
| (Intercept)                        | 3.418e-06  | 1.976e-06 | 2.054e-06 | 1.664 | 0.0961          |      |         |   |                 |
| TF                                 | 1.244e-07  | 2.566e-07 | 2.701e-07 | 0.461 | 0.6451          |      |         |   |                 |
| TP                                 | 6.639e-08  | 1.394e-07 | 1.449e-07 | 0.458 | 0.6469          |      |         |   |                 |
| TPA                                | -6.544e-08 | 2.250e-07 | 2.332e-07 | 0.281 | 0.7790          |      |         |   |                 |
| mossSM                             | 2.375e-06  | 2.795e-06 | 2.896e-06 | 0.820 | 0.4122          |      |         |   |                 |



|                                    |            |           |           |       |                  |      |        |   |                  |  |
|------------------------------------|------------|-----------|-----------|-------|------------------|------|--------|---|------------------|--|
| mossSP                             | 2.220e-06  | 1.855e-06 | 1.941e-06 | 1.144 | 0.2527           |      |        |   |                  |  |
| mossSS                             | -5.003e-07 | 1.614e-06 | 1.700e-06 | 0.294 | 0.7686           |      |        |   |                  |  |
| HYAL4 (full average coefficients)  |            |           |           |       |                  |      |        |   |                  |  |
| (Intercept)                        | 7.222e-05  | 7.120e-05 | 7.187e-05 | 1.005 | 0.315            | TP   | 0.2229 | 1 | 0.6368498        |  |
| mossSM                             | -6.592e-06 | 1.197e-05 | 1.215e-05 | 0.542 | 0.588            | TPA  | 1.0259 | 1 | 0.3111236        |  |
| mossSP                             | 7.750e-06  | 1.137e-05 | 1.152e-05 | 0.673 | 0.501            | TF   | 4.0077 | 1 | <b>0.0452926</b> |  |
| mossSS                             | -1.324e-05 | 1.903e-05 | 1.919e-05 | 0.690 | 0.490            | moss | 16.44  | 3 | <b>0.0009211</b> |  |
| TF                                 | -3.914e-06 | 6.248e-06 | 6.309e-06 | 0.620 | 0.535            |      |        |   |                  |  |
| TP                                 | -1.010e-07 | 4.658e-07 | 4.834e-07 | 0.209 | 0.835            |      |        |   |                  |  |
| TPA                                | -1.623e-07 | 5.235e-07 | 5.411e-07 | 0.300 | 0.764            |      |        |   |                  |  |
| (conditional average coefficients) |            |           |           |       |                  |      |        |   |                  |  |
| (Intercept)                        | 7.222e-05  | 7.120e-05 | 7.187e-05 | 1.005 | 0.3150           |      |        |   |                  |  |
| mossSM                             | -1.689e-05 | 1.391e-05 | 1.430e-05 | 1.181 | 0.2376           |      |        |   |                  |  |
| mossSP                             | 1.985e-05  | 9.531e-06 | 9.979e-06 | 1.990 | <b>0.0466</b>    |      |        |   |                  |  |
| mossSS                             | -3.393e-05 | 1.504e-05 | 1.553e-05 | 2.184 | <b>0.0290</b>    |      |        |   |                  |  |
| TF                                 | -7.508e-06 | 6.920e-06 | 7.026e-06 | 1.069 | 0.2853           |      |        |   |                  |  |
| TP                                 | -5.172e-07 | 9.467e-07 | 9.909e-07 | 0.522 | 0.6017           |      |        |   |                  |  |
| TPA                                | -7.527e-07 | 9.089e-07 | 9.557e-07 | 0.788 | 0.4310           |      |        |   |                  |  |
| MMP1 (full average coefficients)   |            |           |           |       |                  |      |        |   |                  |  |
| (Intercept)                        | 4.877e-01  | 6.194e-02 | 6.539e-02 | 7.458 | <b>&lt;2e-16</b> | TP   | 0.8448 | 1 | 0.358            |  |
| TPA                                | 1.533e-03  | 4.536e-03 | 4.704e-03 | 0.326 | 0.744            | TPA  | 1.6817 | 1 | 0.195            |  |
| TF                                 | 6.882e-04  | 4.038e-03 | 4.272e-03 | 0.161 | 0.872            | TF   | 0.3186 | 1 | 0.572            |  |
| TP                                 | -9.667e-05 | 2.421e-03 | 2.535e-03 | 0.038 | 0.970            | moss | 1.8034 | 3 | 0.614            |  |
| mossSM                             | -3.291e-04 | 9.712e-03 | 1.015e-02 | 0.032 | 0.974            |      |        |   |                  |  |
| mossSP                             | -3.285e-04 | 7.522e-03 | 7.876e-03 | 0.042 | 0.967            |      |        |   |                  |  |
| mossSS                             | -2.293e-04 | 6.529e-03 | 6.912e-03 | 0.033 | 0.974            |      |        |   |                  |  |
| (conditional average coefficients) |            |           |           |       |                  |      |        |   |                  |  |
| (Intercept)                        | 0.4877300  | 0.0619354 | 0.0653927 | 7.458 | <b>&lt;2e-16</b> |      |        |   |                  |  |
| TPA                                | 0.0061255  | 0.0073523 | 0.0077623 | 0.789 | 0.430            |      |        |   |                  |  |
| TF                                 | 0.0035326  | 0.0085806 | 0.0091451 | 0.386 | 0.699            |      |        |   |                  |  |
| TP                                 | -0.0004894 | 0.0054293 | 0.0056862 | 0.086 | 0.931            |      |        |   |                  |  |
| mossSM                             | -0.0366302 | 0.0957600 | 0.1006899 | 0.364 | 0.716            |      |        |   |                  |  |
| mossSP                             | -0.0365627 | 0.0705282 | 0.0746969 | 0.489 | 0.625            |      |        |   |                  |  |
| mossSS                             | -0.0255234 | 0.0640276 | 0.0683612 | 0.373 | 0.709            |      |        |   |                  |  |
| MMP8 (full average coefficients)   |            |           |           |       |                  |      |        |   |                  |  |
| (Intercept)                        | 1.200e-05  | 6.403e-06 | 6.614e-06 | 1.814 | 0.0696           | TP   | 2.5876 | 1 | 0.108            |  |
| TF                                 | -4.435e-07 | 5.089e-07 | 5.246e-07 | 0.846 | 0.3978           | TPA  | 0.00   | 1 | 0.991            |  |
| TP                                 | -1.426e-07 | 2.448e-07 | 2.514e-07 | 0.567 | 0.5705           | TF   | 0.2392 | 1 | 0.625            |  |
| TPA                                | -1.065e-07 | 2.489e-07 | 2.564e-07 | 0.415 | 0.6778           | moss | 3.7207 | 3 | 0.293            |  |
| mossSM                             | 1.479e-07  | 1.831e-06 | 1.890e-06 | 0.078 | 0.9376           |      |        |   |                  |  |
| mossSP                             | 7.642e-09  | 1.180e-06 | 1.230e-06 | 0.006 | 0.9950           |      |        |   |                  |  |
| mossSS                             | 3.706e-07  | 1.411e-06 | 1.445e-06 | 0.256 | 0.7976           |      |        |   |                  |  |



|                                    |            |           |           |       |               |      |        |   |       |
|------------------------------------|------------|-----------|-----------|-------|---------------|------|--------|---|-------|
| (conditional average coefficients) |            |           |           |       |               |      |        |   |       |
| (Intercept)                        | 1.200e-05  | 6.403e-06 | 6.614e-06 | 1.814 | 0.0696        |      |        |   |       |
| TF                                 | -7.533e-07 | 4.544e-07 | 4.838e-07 | 1.557 | 0.1194        |      |        |   |       |
| TP                                 | -3.328e-07 | 2.766e-07 | 2.902e-07 | 1.147 | 0.2514        |      |        |   |       |
| TPA                                | -3.524e-07 | 3.439e-07 | 3.618e-07 | 0.974 | 0.3301        |      |        |   |       |
| mossSM                             | 1.421e-06  | 5.512e-06 | 5.701e-06 | 0.249 | 0.8032        |      |        |   |       |
| mossSP                             | 7.338e-08  | 3.656e-06 | 3.810e-06 | 0.019 | 0.9846        |      |        |   |       |
| mossSS                             | 3.559e-06  | 2.785e-06 | 2.951e-06 | 1.206 | 0.2278        |      |        |   |       |
| MMP13 (full average coefficients)  |            |           |           |       |               |      |        |   |       |
| (Intercept)                        | 1.259e-04  | 9.276e-05 | 9.520e-05 | 1.322 | 0.186         | TP   | 1.013  | 1 | 0.314 |
| mossSM                             | 3.293e-06  | 1.889e-05 | 1.996e-05 | 0.165 | 0.869         | TPA  | 0.043  | 1 | 0.836 |
| mossSP                             | -4.398e-06 | 1.509e-05 | 1.596e-05 | 0.276 | 0.783         | TF   | 0.775  | 1 | 0.379 |
| mossSS                             | 2.051e-05  | 3.015e-05 | 3.061e-05 | 0.670 | 0.503         | moss | 7.4231 | 3 | 0.06  |
| TF                                 | -4.498e-06 | 7.603e-06 | 7.805e-06 | 0.576 | 0.564         |      |        |   |       |
| TPA                                | -4.789e-07 | 1.842e-06 | 1.925e-06 | 0.249 | 0.803         |      |        |   |       |
| TP                                 | -4.661e-07 | 1.759e-06 | 1.848e-06 | 0.252 | 0.801         |      |        |   |       |
| (conditional average coefficients) |            |           |           |       |               |      |        |   |       |
| (Intercept)                        | 1.259e-04  | 9.276e-05 | 9.520e-05 | 1.322 | 0.1861        |      |        |   |       |
| mossSM                             | 8.794e-06  | 3.007e-05 | 3.187e-05 | 0.276 | 0.7826        |      |        |   |       |
| mossSP                             | -1.174e-05 | 2.284e-05 | 2.437e-05 | 0.482 | 0.6299        |      |        |   |       |
| mossSS                             | 5.475e-05  | 2.349e-05 | 2.502e-05 | 2.188 | <b>0.0287</b> |      |        |   |       |
| TF                                 | -9.294e-06 | 8.653e-06 | 9.016e-06 | 1.031 | 0.3026        |      |        |   |       |
| TPA                                | -2.325e-06 | 3.489e-06 | 3.700e-06 | 0.628 | 0.5298        |      |        |   |       |
| TP                                 | -2.249e-06 | 3.305e-06 | 3.530e-06 | 0.637 | 0.5241        |      |        |   |       |
| TYR (full average coefficients)    |            |           |           |       |               |      |        |   |       |
| (Intercept)                        | 1.669e-04  | 1.140e-04 | 1.167e-04 | 1.430 | 0.153         | TP   | 0.1538 | 1 | 0.695 |
| TF                                 | -8.447e-06 | 9.257e-06 | 9.485e-06 | 0.891 | 0.373         | TPA  | 0.0857 | 1 | 0.77  |
| TPA                                | -1.215e-06 | 3.029e-06 | 3.141e-06 | 0.387 | 0.699         | TF   | 0.5431 | 1 | 0.461 |
| TP                                 | -5.936e-07 | 2.020e-06 | 2.121e-06 | 0.280 | 0.780         | moss | 3.5654 | 3 | 0.312 |
| mossSM                             | -2.481e-07 | 1.640e-05 | 1.757e-05 | 0.014 | 0.989         |      |        |   |       |
| mossSP                             | -5.556e-06 | 1.837e-05 | 1.911e-05 | 0.291 | 0.771         |      |        |   |       |
| mossSS                             | 1.041e-05  | 2.714e-05 | 2.767e-05 | 0.376 | 0.707         |      |        |   |       |
| (conditional average coefficients) |            |           |           |       |               |      |        |   |       |
| (Intercept)                        | 1.669e-04  | 1.140e-04 | 1.167e-04 | 1.430 | 0.153         |      |        |   |       |
| TF                                 | -1.293e-05 | 8.556e-06 | 8.931e-06 | 1.448 | 0.148         |      |        |   |       |
| TPA                                | -4.423e-06 | 4.385e-06 | 4.662e-06 | 0.949 | 0.343         |      |        |   |       |
| TP                                 | -2.372e-06 | 3.476e-06 | 3.709e-06 | 0.639 | 0.523         |      |        |   |       |
| mossSM                             | -1.428e-06 | 3.932e-05 | 4.214e-05 | 0.034 | 0.973         |      |        |   |       |
| mossSP                             | -3.198e-05 | 3.313e-05 | 3.545e-05 | 0.902 | 0.367         |      |        |   |       |
| mossSS                             | 5.991e-05  | 3.569e-05 | 3.799e-05 | 1.577 | 0.115         |      |        |   |       |
| HAS1 (full average coefficients)   |            |           |           |       |               |      |        |   |       |
| (Intercept)                        | 1.909e-05  | 7.271e-06 | 7.534e-06 | 2.534 | 0.0113        | TP   | 0.0637 | 1 | 0.801 |



|                                    |            |           |           |       |                 |      |         |   |              |
|------------------------------------|------------|-----------|-----------|-------|-----------------|------|---------|---|--------------|
| TPA                                | -3.286e-07 | 5.008e-07 | 5.147e-07 | 0.638 | 0.5232          | TPA  | 4.076   | 1 | 0.044        |
| TP                                 | -2.582e-08 | 2.260e-07 | 2.354e-07 | 0.110 | 0.9126          | TF   | 3.0066  | 1 | 0.083        |
| TF                                 | -9.740e-08 | 5.438e-07 | 5.612e-07 | 0.174 | 0.8622          | moss | 4.8787  | 3 | 0.181        |
| mossSM                             | 2.736e-09  | 1.146e-06 | 1.192e-06 | 0.002 | 0.9982          |      |         |   |              |
| mossSP                             | -1.125e-07 | 1.141e-06 | 1.172e-06 | 0.096 | 0.9235          |      |         |   |              |
| mossSS                             | 4.841e-08  | 1.124e-06 | 1.161e-06 | 0.042 | 0.9668          |      |         |   |              |
| (conditional average coefficients) |            |           |           |       |                 |      |         |   |              |
| (Intercept)                        | 1.909e-05  | 7.271e-06 | 7.534e-06 | 2.534 | <b>0.0113</b>   |      |         |   |              |
| TPA                                | -7.465e-07 | 5.077e-07 | 5.383e-07 | 1.387 | 0.1656          |      |         |   |              |
| TP                                 | -1.033e-07 | 4.430e-07 | 4.622e-07 | 0.223 | 0.8232          |      |         |   |              |
| TF                                 | -4.103e-07 | 1.057e-06 | 1.095e-06 | 0.375 | 0.7078          |      |         |   |              |
| mossSM                             | 1.387e-07  | 8.160e-06 | 8.486e-06 | 0.016 | 0.9870          |      |         |   |              |
| mossSP                             | -5.702e-06 | 5.847e-06 | 6.143e-06 | 0.928 | 0.3533          |      |         |   |              |
| mossSS                             | 2.454e-06  | 7.623e-06 | 7.905e-06 | 0.311 | 0.7562          |      |         |   |              |
| HAS2 (full average coefficients)   |            |           |           |       |                 |      |         |   |              |
| (Intercept)                        | 2.559e-02  | 5.973e-03 | 6.327e-03 | 4.044 | <b>5.25e-05</b> | TP   | 0.6224  | 1 | 0.43         |
| mossSM                             | -4.857e-03 | 3.523e-03 | 3.592e-03 | 1.352 | 0.176           | TPA  | 0.4655  | 1 | 0.495        |
| mossSP                             | -4.539e-03 | 3.120e-03 | 3.170e-03 | 1.432 | 0.152           | TF   | 0.1416  | 1 | 0.707        |
| mossSS                             | -3.068e-03 | 2.376e-03 | 2.442e-03 | 1.256 | 0.209           | moss | 16.1623 | 3 | <b>0.001</b> |
| TP                                 | -4.396e-05 | 2.389e-04 | 2.453e-04 | 0.179 | 0.858           |      |         |   |              |
| TPA                                | -6.799e-05 | 2.042e-04 | 2.113e-04 | 0.322 | 0.748           |      |         |   |              |
| TF                                 | -3.773e-05 | 4.538e-04 | 4.848e-04 | 0.078 | 0.938           |      |         |   |              |
| (conditional average coefficients) |            |           |           |       |                 |      |         |   |              |
| (Intercept)                        | 0.0255878  | 0.0059726 | 0.0063272 | 4.044 | 5.25e-05        |      |         |   |              |
| mossSM                             | -0.0066195 | 0.0022914 | 0.0024320 | 2.722 | <b>0.006492</b> |      |         |   |              |
| mossSP                             | -0.0061856 | 0.0017539 | 0.0018731 | 3.302 | <b>0.000959</b> |      |         |   |              |
| mossSS                             | -0.0041809 | 0.0017429 | 0.0018636 | 2.243 | <b>0.024868</b> |      |         |   |              |
| TP                                 | -0.0001934 | 0.0004714 | 0.0004858 | 0.398 | 0.690462        |      |         |   |              |
| TPA                                | -0.0003497 | 0.0003405 | 0.0003620 | 0.966 | 0.334018        |      |         |   |              |
| TF                                 | -0.0002871 | 0.0012229 | 0.0013101 | 0.219 | 0.826553        |      |         |   |              |
| HAS3 (full average coefficients)   |            |           |           |       |                 |      |         |   |              |
| (Intercept)                        | 6.605e-04  | 1.357e-04 | 1.415e-04 | 4.669 | <b>0.000003</b> | TP   | 0.0063  | 1 | 0.937        |
| TPA                                | -1.026e-05 | 1.038e-05 | 1.062e-05 | 0.966 | 0.334           | TPA  | 2.7902  | 1 | 0.095        |
| TP                                 | -1.984e-06 | 4.884e-06 | 5.033e-06 | 0.394 | 0.693           | TF   | 0.0313  | 1 | 0.86         |
| TF                                 | -3.357e-06 | 9.956e-06 | 1.036e-05 | 0.324 | 0.746           | moss | 5.2756  | 3 | 0.153        |
| mossSM                             | -2.945e-06 | 3.134e-05 | 3.268e-05 | 0.090 | 0.928           |      |         |   |              |
| mossSP                             | -6.831e-06 | 3.138e-05 | 3.224e-05 | 0.212 | 0.832           |      |         |   |              |
| mossSS                             | -4.483e-06 | 2.668e-05 | 2.772e-05 | 0.162 | 0.872           |      |         |   |              |
| (conditional average coefficients) |            |           |           |       |                 |      |         |   |              |
| (Intercept)                        | 6.605e-04  | 1.357e-04 | 1.415e-04 | 4.669 | <b>0.000003</b> |      |         |   |              |
| TPA                                | -1.699e-05 | 8.002e-06 | 8.515e-06 | 1.995 | <b>0.046</b>    |      |         |   |              |
| TP                                 | -6.330e-06 | 6.970e-06 | 7.301e-06 | 0.867 | 0.386           |      |         |   |              |



|        |            |           |           |       |       |
|--------|------------|-----------|-----------|-------|-------|
| TF     | -1.240e-05 | 1.594e-05 | 1.687e-05 | 0.735 | 0.462 |
| mossSM | -3.570e-05 | 1.036e-04 | 1.085e-04 | 0.329 | 0.742 |
| mossSP | -8.282e-05 | 7.511e-05 | 7.943e-05 | 1.043 | 0.297 |
| mossSS | -5.435e-05 | 7.692e-05 | 8.128e-05 | 0.669 | 0.504 |

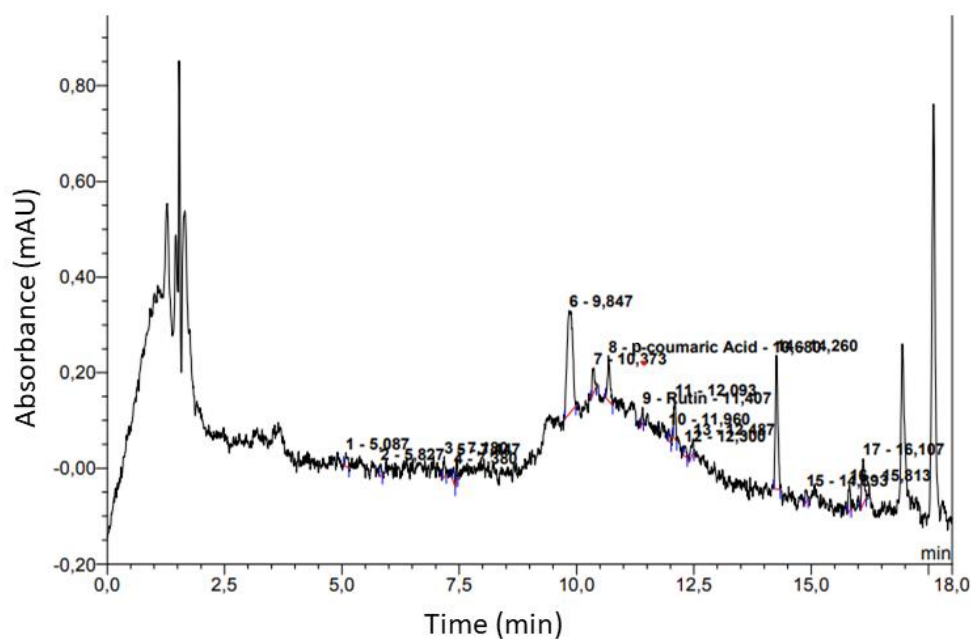

Figure S1. Chromatogram of *Sphagnum girgensohnii* Russow. (0.141 mg/g *p*-coumaric acid, 0.064 mg/g rutin).

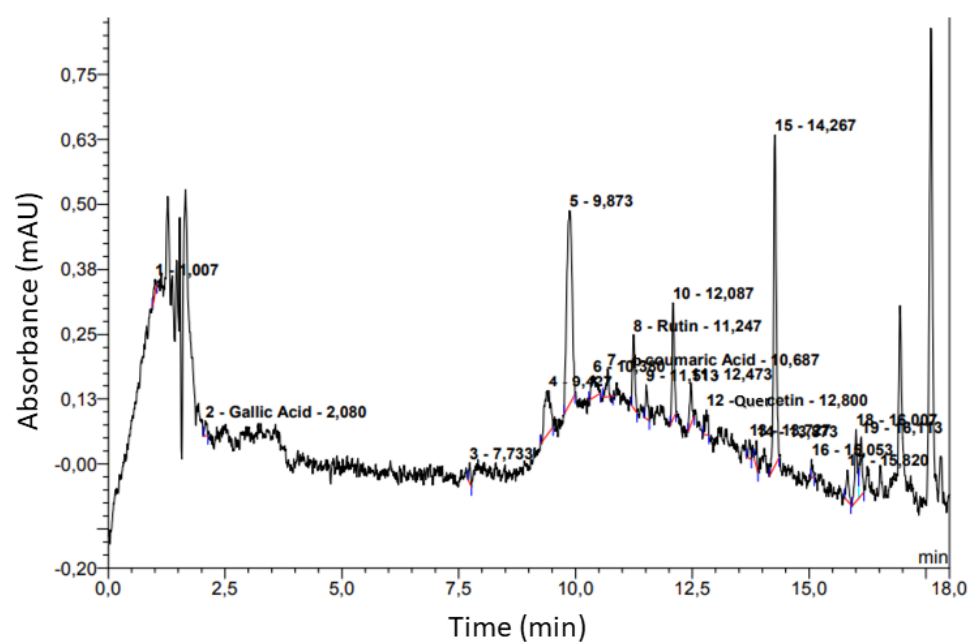

Figure S2. Chromatogram of *Sphagnum magellanicum* Brid. (0.069 mg/g *p*-coumaric acid, 0.510 mg/g rutin, 0.142 mg/g quercetin).



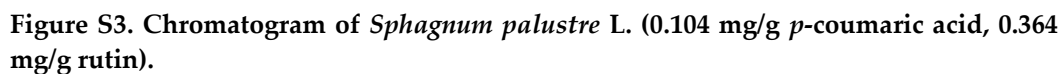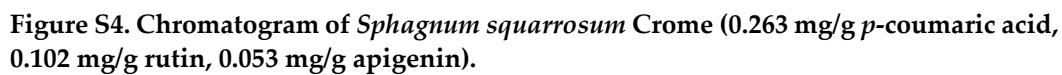

Supplement: s1 [file s1]
